# Supplementary material for: Pharmacist Computer Skills and Needs Assessment Survey
Source: PubMed Central journal article supplement (PMC1550586; doi:10.2196/jmir.6.1.e11), 2004-03-29
Supplement: jmir_v6i1e11_app1.pdf [file jmir_v6i1e11_app1.pdf]

## Appendix 1. Survey form

### VHHSC CSU Pharm. Sci. Computer User Survey - Please circle the most appropriate response to each of the following

This is an **anonymous** survey. The intent is to gain a better understanding of the computer skill sets of the department members and to use this information to determine our training and resource development strategies. Dr. Robert Balen will be collating results which will be presented to department members at regular meetings. Please be honest with your replies. We recognize that computer skills vary between individuals.

#### Demographics

|                                                                      |         |           |             |          |       |
|----------------------------------------------------------------------|---------|-----------|-------------|----------|-------|
| How many years have you been in pharmacy practice?                   | 0-5     | 6-10      | 11-15       | >15      |       |
| What is your current classification?                                 | Pharm I | Pharm II  | Pharm III   | Pharm IV | Other |
| Do you have a computer at home?                                      | Yes     | No        |             |          |       |
| If so, what operating system do you use at home?                     | Win 95  | Win 98 SE | Win 2000/NT | Linux    | Mac   |
| Have you had any formal computer training (ie courses of some sort)? | Yes     | No        |             |          |       |
| If so please indicate which courses you have taken:                  |         |           |             |          |       |

How many hours a week do you use a computer in the following settings:

|                                      |     |           |          |         |        |
|--------------------------------------|-----|-----------|----------|---------|--------|
| At work (excluding PCIS order entry) | 0 h | > 0 - 5 h | 6 - 10 h | 11-15 h | > 15 h |
| Home                                 | 0 h | > 0 - 5 h | 6 - 10 h | 11-15 h | > 15 h |

#### Computer Experience

Please respond to each of the following statements:

|                                                                                  |         |                 |           |          |                      |
|----------------------------------------------------------------------------------|---------|-----------------|-----------|----------|----------------------|
| I have used a word processor (e.g. MS Word) to compose a text document           | 1 never | 2 once or twice | 3 monthly | 4 weekly | 5 daily              |
| I have used a presentation program (e.g. Powerpoint) to create a presentation    | 1 never | 2 once or twice | 3 monthly | 4 weekly | 5 daily              |
| I have used a spreadsheet program (e.g. Excell)                                  | 1 never | 2 once or twice | 3 monthly | 4 weekly | 5 daily              |
| I have used a database program (e.g. Access)                                     | 1 never | 2 once or twice | 3 monthly | 4 weekly | 5 daily              |
| I have used a statistical analysis program (e.g. SPSS)                           | 1 never | 2 once or twice | 3 monthly | 4 weekly | 5 daily              |
| I use an email program (e.g. GroupWise)                                          | never   | monthly         | weekly    | daily    | multiple times daily |
| I have used the hospital computer to process a doctors order                     | 1 never | 2 once or twice | 3 monthly | 4 weekly | 5 daily              |
| I have used the hospital computer to look up laboratory test results             | 1 never | 2 once or twice | 3 monthly | 4 weekly | 5 daily              |
| I have used other special features on the hospital computer system e.g. hotlists | 1 never | 2 once or twice | 3 monthly | 4 weekly | 5 daily              |
| I have used an internet search engine (e.g. Google) to find clinical information | 1 never | 2 once or twice | 3 monthly | 4 weekly | 5 daily              |

|                                                                   |         |                 |           |          |         |
|-------------------------------------------------------------------|---------|-----------------|-----------|----------|---------|
| I have searched a medical database using the OVID search engine   | 1 never | 2 once or twice | 3 monthly | 4 weekly | 5 daily |
| I have searched a medical database using the PubMed search engine | 1 never | 2 once or twice | 3 monthly | 4 weekly | 5 daily |
| I have used a handheld computer (e.g. Palm) at work or at home    | 1 never | 2 once or twice | 3 monthly | 4 weekly | 5 daily |

### Computer Anxiety

|                                                                                                      |              |   |   |   |                   |
|------------------------------------------------------------------------------------------------------|--------------|---|---|---|-------------------|
| How would you rate your overall computer literacy?                                                   | 1 illiterate | 2 | 3 | 4 | 5 expert          |
| How does your current level of computer literacy compare to your desired level of computer literacy? | 1 need more  | 2 | 3 | 4 | 5 don't need more |
| Are you anxious about the use of computers for purposes other than PCIS?                             | 1 disagree   | 2 | 3 | 4 | 5 strongly agree  |

### Computer Vocabulary

Do you feel you are able to describe the following terminology?

|                          |    |     |
|--------------------------|----|-----|
| Hard drive               | No | Yes |
| Network drive            | No | Yes |
| RAM                      | No | Yes |
| Local area network (LAN) | No | Yes |
| Workstation              | No | Yes |
| Computer virus           | No | Yes |
| Multi-tasking            | No | Yes |
| URL Address              | No | Yes |
| Hardware vs. software    | No | Yes |
| PDF file                 | No | Yes |

### Basic Computer Skills

Please rate your ability to do each of the following tasks:

|                                          |          |   |   |   |          |
|------------------------------------------|----------|---|---|---|----------|
| Create a file or a folder                | 1 unable | 2 | 3 | 4 | 5 expert |
| Rename a file or a folder                | 1 unable | 2 | 3 | 4 | 5 expert |
| Move a file or folder                    | 1 unable | 2 | 3 | 4 | 5 expert |
| Copy a file or folder                    | 1 unable | 2 | 3 | 4 | 5 expert |
| Copy and paste a file or folder          | 1 unable | 2 | 3 | 4 | 5 expert |
| Install a software program               | 1 unable | 2 | 3 | 4 | 5 expert |
| Find answers using on-line help features | 1 unable | 2 | 3 | 4 | 5 expert |
| Switch between open applications         | 1 unable | 2 | 3 | 4 | 5 expert |

|                                                     |          |   |   |   |          |
|-----------------------------------------------------|----------|---|---|---|----------|
| Search for files and directories on a computer      | 1 unable | 2 | 3 | 4 | 5 expert |
| Minimize and maximize windows                       | 1 unable | 2 | 3 | 4 | 5 expert |
| Overall, I would rate my file management skills as: | 1 unable | 2 | 3 | 4 | 5 expert |

**Communications**

Please rate your ability to do each of the following tasks:

|                                                                   |          |   |   |   |          |
|-------------------------------------------------------------------|----------|---|---|---|----------|
| Receive and read email                                            | 1 unable | 2 | 3 | 4 | 5 expert |
| Send email                                                        | 1 unable | 2 | 3 | 4 | 5 expert |
| Send a document as an email attachment                            | 1 unable | 2 | 3 | 4 | 5 expert |
| Set-up a group mailing list                                       | 1 unable | 2 | 3 | 4 | 5 expert |
| View an email attachment that I receive from others               | 1 unable | 2 | 3 | 4 | 5 expert |
| Save an email attachment sent to me by someone                    | 1 unable | 2 | 3 | 4 | 5 expert |
| Make mailboxes for saving and organizing important email messages | 1 unable | 2 | 3 | 4 | 5 expert |
| Manage email messages by creating folders and filtering rules     | 1 unable | 2 | 3 | 4 | 5 expert |
| Keep copies of email messages that I send to others               | 1 unable | 2 | 3 | 4 | 5 expert |

**Internet Skills**

Please rate your ability to do each of the following tasks:

|                                             |        |   |   |   |          |
|---------------------------------------------|--------|---|---|---|----------|
| Open a web page by typing in an web address | 1 none | 2 | 3 | 4 | 5 expert |
| Download files from an internet website     | 1 none | 2 | 3 | 4 | 5 expert |
| Keep track of web sites using bookmarks     | 1 none | 2 | 3 | 4 | 5 expert |

**Clinical Database Information Retrieval**

Please rate your ability to do each of the following tasks:

|                                                               |          |   |   |   |          |
|---------------------------------------------------------------|----------|---|---|---|----------|
| Use the OVID search engine                                    | 1 unable | 2 | 3 | 4 | 5 expert |
| Use the PubMed search engine                                  | 1 unable | 2 | 3 | 4 | 5 expert |
| Explain the difference between OVID and PubMed search engines | 1 unable | 2 | 3 | 4 | 5 expert |

|                                                                                          |      |   |   |   |                 |
|------------------------------------------------------------------------------------------|------|---|---|---|-----------------|
| Do you know which on-line resources are available to you at VHHSC?                       | 1 no | 2 | 3 | 4 | 5 know them all |
| Do you know what online resource to use for each type of drug problem you may encounter? | 1 no | 2 | 3 | 4 | 5 I'm an expert |

|                                                                        |         |   |   |   |                                                                 |
|------------------------------------------------------------------------|---------|---|---|---|-----------------------------------------------------------------|
| Do you use <b>Clinical Pharmacology 2000</b> ?                         | 1 never | 2 | 3 | 4 | 5 frequently<br>e.g weekly<br>5 expert<br>knowledge             |
| Are you familiar with what kind of information this database provides? | 1 no    | 2 | 3 | 4 |                                                                 |
| How would you rate your ability to use this database?                  | 1 poor  | 2 | 3 | 4 | 5 expert<br>5 frequently<br>e.g weekly<br>5 expert<br>knowledge |
| Do you use <b>MD Consult</b> ?                                         | 1 never | 2 | 3 | 4 |                                                                 |
| Are you familiar with what kind of information this database provides? | 1 no    | 2 | 3 | 4 |                                                                 |
| How would you rate your ability to use this database?                  | 1 poor  | 2 | 3 | 4 | 5 expert<br>5 frequently<br>e.g weekly<br>5 expert<br>knowledge |
| Do you use <b>UpToDate</b> ?                                           | 1 never | 2 | 3 | 4 |                                                                 |
| Are you familiar with what kind of information this database provides? | 1 no    | 2 | 3 | 4 |                                                                 |
| How would you rate your ability to use this database?                  | 1 poor  | 2 | 3 | 4 | 5 expert                                                        |

**Access to computers**

How difficult is it for you to get access to a computer at work? 1 impossible 2 3 4 5 easy

**Rank Your Anticipated Future Need**

Please rate your anticipated future needs for the following skills according to their relevance to your professional job effectiveness:

|                                      |           |   |   |   |                       |
|--------------------------------------|-----------|---|---|---|-----------------------|
| Word processing software skills      | 1 no need | 2 | 3 | 4 | 5 significant<br>need |
| Presentation software skills         | 1 no need | 2 | 3 | 4 | 5 significant<br>need |
| Spreadsheet software skills          | 1 no need | 2 | 3 | 4 | 5 significant<br>need |
| Database software skills             | 1 no need | 2 | 3 | 4 | 5 significant<br>need |
| Web browser navigation skills        | 1 no need | 2 | 3 | 4 | 5 significant<br>need |
| Internet search skills               | 1 no need | 2 | 3 | 4 | 5 significant<br>need |
| Medical database search skills       | 1 no need | 2 | 3 | 4 | 5 significant<br>need |
| Statistical analysis software skills | 1 no need | 2 | 3 | 4 | 5 significant<br>need |

|                                                                                                              |           |   |   |   |                    |
|--------------------------------------------------------------------------------------------------------------|-----------|---|---|---|--------------------|
| Advanced e-mail management skills                                                                            | 1 no need | 2 | 3 | 4 | 5 significant need |
| How would you rate the following statement                                                                   |           |   |   |   |                    |
| How much do you feel you need to upgrade your computer skills in order to perform your job more effectively? | 1 none    | 2 | 3 | 4 | 5 significantly    |
| What is the biggest technology-related challenge that you face at work?                                      |           |   |   |   |                    |
